# Supplementary material for: Magnetic to the Core – communicating palaeomagnetism with hands-on activities
Source: Copernicus journal article supplement (doi:10.5194/gc-5-55-2022), 2022-03-07
Supplement: Supplementary file 2 [file gc-5-55-2022-supplement.zip]

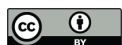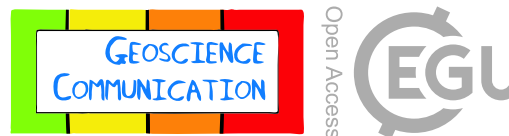

## *Supplement of*

# **Magnetic to the Core – communicating palaeomagnetism with hands-on activities**

**Annique van der Boon et al.**

*Correspondence to:* Annique van der Boon (avanderboon.work@gmail.com)

- gc-5-55-2022-supplement-title-page.pdf
- Supplementary file 1.pdf
- Supplementary file 2.xlsx

The copyright of individual parts of the supplement might differ from the article licence.
